# Supplementary material
Source: publisher figshare collection journal article supplement (https://gsapubs.figshare.com/ndownloader/files/22747949)
Supplement: Supplementary file 1 [file 22747949]

## Sheet: Sheet1
Data repository 3: U-Pb zircon geochronology and depositional age models for the Upper Triassic Chinle Formation (Petrified Forest National Park, Arizona, USA): implications for Late Triassic paleoecological and paleoenvironmental change
Cornelia Rasmussen1,2,3†, Roland Mundil4, Randall B. Irmis1,2, Dominique Geisler5, George E. Gehrels5, Paul E. Olsen6, Dennis V. Kent6,7, Christopher Lepre6,7, Sean T. Kinney6, John W. Geissmann8,9, and William G. Parker10
1Department of Geology & Geophysics, University of Utah, Salt Lake City, UT 84112-0102, USA; 2Natural History Museum of Utah, University of Utah, Salt Lake City, UT 84108-1214, USA; 3Institute for Geophysics, Jackson School of Geosciences, University of Texas at Austin, Austin, Texas 78758, USA, 4Berkeley Geochronology Center, Berkeley, CA 94709; 5Department of Geosciences, University of Arizona,…
Table DR2: Summary of radiogenic isotope ratios and ages including their uncertainties obtained via CA-TIMS analyses. The order of spot numbers is based on the youngest to oldest crystal age within the individual sample.
			Isotopic ratios								isotopic age in (Ma)
	Pbc	Th	206Pb	207Pb	2σ	207Pb	2σ	206Pb	2σ		206Pb*
Sample	(pg)	U	204 Pb	206 Pb	%er	235U	%er	238U	%er	ρ	238U
52Q-2-Spot 020	0.910958	1.97347	234.272	0.0501831	2.66406	0.221674	2.80742	0.0320523	0.346795	0.463944	203.38	±	0.694301
52Q-2-Spot 221	0.836051	1.82163	233.249	0.0501537	2.8429	0.228488	2.98088	0.0330568	0.302715	0.495337	209.652	±	0.624439
52Q-2-Spot 204	1.16515	1.24901	201.252	0.0489806	3.29816	0.223391	3.46143	0.0330936	0.381818	0.472205	209.881	±	0.788457
52Q-2-Spot 155	0.967627	0.381617	421.638	0.0505827	1.35757	0.231098	1.42861	0.033151	0.184692	0.438554	210.239	±	0.382032
52Q-2-Spot 108	0.760207	0.594771	401.339	0.0497658	1.58113	0.227443	1.67587	0.0331622	0.215157	0.490827	210.309	±	0.445194
52Q-2-Spot 057	1.1984	1.50586	247.191	0.0500695	2.38111	0.228864	2.50104	0.033167	0.326485	0.423054	210.339	±	0.675644
52Q-2-Spot 052	1.05344	0.833476	630.619	0.0505225	1.01463	0.231235	1.07125	0.03321	0.149493	0.435426	210.608	±	0.309757
52Q-2-Spot 201	0.92326	1.65106	885.581	0.0503138	0.670953	0.230529	0.752545	0.033246	0.221178	0.492672	210.832	±	0.45877
52Q-2-Spot 141	1.04537	1.28639	139.895	0.0502395	4.62711	0.231139	4.84157	0.0333833	0.446687	0.515242	211.688	±	0.930227
52Q-2-Spot 115	1.18867	0.98908	243.971	0.0505263	2.35274	0.232597	2.46103	0.0334031	0.275529	0.439539	211.812	±	0.574121
52Q-2-Spot 314	1.08352	0.513855	1241.99	0.0504047	0.539852	0.232078	0.646626	0.0334091	0.285967	0.56105	211.849	±	0.595973
158Q-2-Spot 055	1.73102	1.56183	686.462	0.0505252	1.1769	0.228302	1.25539	0.032787	0.225551	0.425081	207.968	±	0.461588
158Q-2-Spot 276	1.0623	1.66175	1005.33	0.0501253	0.880444	0.226785	0.961164	0.0328291	0.254123	0.434332	208.23	±	0.520705
158Q-2-Spot 168	1.4454	1.45332	864.049	0.0505553	0.660534	0.229694	0.716336	0.0329673	0.153737	0.451359	209.093	±	0.316296
158Q-2-Spot 233	1.41852	1.3377	239.048	0.0494797	4.20885	0.227583	4.45037	0.0333744	0.497632	0.527815	211.633	±	1.03605
158Q-2-Spot 142	1.39726	0.699391	1459.7	0.0506237	0.41008	0.234395	0.479512	0.0335966	0.203688	0.523393	213.019	±	0.426803
158Q-2-Spot 120	3.73527	1.25498	146.153	0.0505947	3.91046	0.234706	4.09193	0.0336605	0.407642	0.484669	213.417	±	0.855736
158Q-2-Spot 093	0.992066	1.36238	677.159	0.0503679	0.792432	0.233841	0.858837	0.0336874	0.205377	0.427401	213.585	±	0.431467
158Q-2-Spot 015	2.04802	0.9911	370.045	0.0506802	1.52315	0.235394	1.60372	0.0337022	0.221818	0.421789	213.677	±	0.466205
158Q-2-Spot 262	1.20278	0.899612	1166.91	0.0501591	0.677567	0.233026	0.72982	0.0337098	0.189788	0.391749	213.725	±	0.398974
158Q-2-Spot 236	2.65666	1.43093	255.883	0.0511156	3.23755	0.23771	3.40419	0.0337439	0.361094	0.502764	213.938	±	0.759837
158Q-2-Spot 240	1.42198	1.01398	1748.76	0.05052	0.38765	0.235065	0.465114	0.0337618	0.181056	0.580713	214.049	±	0.381185
158Q-2-Spot 161	4.71524	0.760714	341.473	0.0504376	1.80245	0.235852	1.91007	0.0339302	0.274583	0.451833	215.099	±	0.58088
158Q-2-Spot 163	2.73127	0.985961	1711.49	0.0503649	0.465441	0.238492	0.568843	0.0343594	0.255024	0.58919	217.775	±	0.546101
158Q-2-Spot 157	2.67351	1.3365	545.631	0.0506671	1.12305	0.240999	1.19731	0.0345136	0.207715	0.431037	218.735	±	0.446725
177Q-1-Spot 108	3.06517	0.643962	240.547	0.0506565	2.28926	0.235724	2.40376	0.0337484	0.336717	0.401986	213.965	±	0.720173
177Q-1-Spot 168	1.20651	0.764484	445.018	0.0504942	1.3692	0.235974	1.44135	0.0338933	0.200771	0.420002	214.869	±	0.431224
182Q-1-Spot 182	0.567247	0.922794	3652.19	0.0503755	0.447409	0.234268	0.499026	0.033728	0.191166	0.447586	213.839	±	0.408625
182Q-1-Spot 265	0.472131	0.518311	2177.67	0.0501233	0.346615	0.233163	0.409025	0.0337379	0.18071	0.539916	213.9	±	0.386385
182Q-1-Spot 197	0.733957	1.05114	2330.38	0.0505541	0.34342	0.235645	0.445084	0.0338064	0.258879	0.638677	214.327	±	0.554629
182Q-1-Spot 263	0.65066	0.488803	1412.03	0.050264	0.527389	0.234317	0.575428	0.0338098	0.179413	0.412477	214.349	±	0.384417
182Q-1-Spot 005	1.12876	0.969698	573.54	0.0504112	0.914862	0.235599	0.991174	0.0338953	0.279131	0.403675	214.882	±	0.599565
182Q-1-Spot 269	0.933334	1.99292	1320.79	0.0503635	0.97501	0.235658	1.01207	0.0339361	0.230318	0.271753	215.136	±	0.495302
182Q-1-Spot 273	1.05269	0.817399	1460.68	0.0505507	0.372587	0.240187	0.452001	0.0344602	0.227086	0.57019	218.403	±	0.495771
182Q-1-Spot 216	1.56387	0.855816	193.736	0.0517972	2.85794	0.247424	2.97823	0.0346432	0.296795	0.446949	219.543	±	0.651341
196Q-3-Spot 001	1.06966	1.03397	297.032	0.0504727	1.93516	0.235005	2.03454	0.0337682	0.302986	0.39445	214.089	±	0.648404
196Q-3-Spot 018	0.566602	0.661907	3266.24	0.0503366	0.258496	0.234524	0.312528	0.033791	0.139314	0.577199	214.231	±	0.298337
196Q-3-Spot 016	0.570656	1.01831	974.676	0.0508656	0.596541	0.237141	0.652766	0.0338125	0.194293	0.425742	214.365	±	0.416333
196Q-3-Spot 006	0.430678	0.939505	773.947	0.0502679	1.05926	0.234356	1.12698	0.0338128	0.182956	0.440189	214.367	±	0.392042
196Q-3-Spot 011	0.907954	1.24347	391.568	0.0512808	1.55436	0.239124	1.66171	0.0338188	0.411292	0.376334	214.405	±	0.881481
196Q-3-Spot 019	1.23502	0.620894	337.691	0.0508911	1.7031	0.237446	1.79013	0.0338386	0.222528	0.443759	214.528	±	0.477197
196Q-3-Spot 039	0.592984	1.31702	961.434	0.0506778	0.681793	0.236614	0.756319	0.0338625	0.275017	0.439447	214.677	±	0.590167
196Q-3-Spot 004	2.01909	0.891753	392.254	0.050549	1.67532	0.240626	1.78948	0.034524	0.479605	0.364443	218.8	±	1.04897
201Q-1-Spot 075	1.53935	0.605523	879.968	0.0501323	0.911935	0.235171	0.992509	0.0340221	0.309269	0.405758	215.672	±	0.666747
201Q-1-Spot 006	2.8419	0.622828	439.54	0.0506846	1.17309	0.238434	1.2741	0.034118	0.374019	0.406132	216.27	±	0.808574
201Q-1-Spot 206	1.10055	0.866274	899.553	0.0503105	0.999571	0.237862	1.06107	0.0342896	0.191968	0.401547	217.34	±	0.417061
201Q-1-Spot 155	1.65753	0.884282	267.074	0.050709	2.33856	0.240889	2.45222	0.0344523	0.25157	0.492619	218.354	±	0.549101
201Q-1-Spot 134	3.18186	0.72365	296.341	0.0503271	1.75192	0.239087	1.82996	0.0344541	0.218606	0.409115	218.365	±	0.477175
201Q-1-Spot 059	0.624915	0.738411	469.522	0.0510444	1.25649	0.243978	1.31296	0.0346652	0.172539	0.385922	219.68	±	0.378889
201Q-1-Spot 120	2.14787	0.615532	1338.68	0.0504508	0.465056	0.24139	0.521751	0.0347178	0.162609	0.479692	220.008	±	0.351716
201Q-1-Spot 065	0.779202	0.312899	394.196	0.0511634	1.48095	0.246776	1.5506	0.0349811	0.22902	0.371118	221.648	±	0.507427
201Q-1-Spot 093	1.07509	0.906181	302.127	0.0501761	1.97814	0.243547	2.08059	0.0352026	0.269377	0.43569	223.027	±	0.600557
201Q-1-Spot 176	1.09982	1.27972	196.004	0.0503223	3.41732	0.244768	3.5549	0.0352935	0.347608	0.43655	223.594	±	0.763905
201Q-1-Spot 022	1.66226	1.35937	601.39	0.0503609	1.02855	0.247357	1.10075	0.0356395	0.205907	0.430354	225.747	±	0.456784
201Q-1-Spot 052	1.79103	0.943354	665.243	0.0508354	0.958287	0.250458	1.06657	0.0357495	0.231786	0.550011	226.432	±	0.515727
201Q-1-Spot 164	1.65804	1.4483	693.009	0.0507002	0.868596	0.252559	0.924625	0.0361455	0.145709	0.447752	228.897	±	0.327671
201Q-1-Spot 040	7.21371	0.77479	315.999	0.0506975	1.66477	0.256115	1.75652	0.0366563	0.244763	0.43357	232.074	±	0.557927
215Q-2-Spot 214	1.02139	0.849627	317.996	0.050525	1.87495	0.235845	1.95482	0.0338539	0.233252	0.395057	214.624	±	0.500417
215Q-2-Spot 163	0.74667	0.981418	339.675	0.0504835	1.91298	0.236877	2.02699	0.0340466	0.248889	0.505552	215.825	±	0.528271
215Q-2-Spot 118	2.04109	0.894084	278.041	0.0507697	1.92338	0.239001	2.01937	0.0341582	0.21423	0.489225	216.521	±	0.456149
215Q-2-Spot 046	0.405004	0.689688	1269.36	0.0505037	0.882957	0.239245	0.928268	0.034357	0.152684	0.371761	217.76	±	0.332356
215Q-2-Spot 235	0.458293	1.09969	1687.75	0.0507085	0.359467	0.240285	0.412891	0.0343671	0.173105	0.498282	217.822	±	0.376915
215Q-2-Spot 188	1.60057	1.16206	273.308	0.0507867	2.37912	0.24083	2.54729	0.0344083	0.418172	0.470471	218.079	±	0.896692
215Q-2-Spot 232	1.47491	1.20711	601.394	0.0500651	1.27744	0.237604	1.4038	0.03442	0.41374	0.439027	218.153	±	0.902237
215Q-2-Spot 167	0.912358	1.05287	1125.04	0.0504766	0.529395	0.239573	0.584758	0.0344389	0.140951	0.488437	218.27	±	0.302504
215Q-2-Spot 047	0.419647	1.11143	358.302	0.0508054	1.70485	0.241281	1.77233	0.0344431	0.195922	0.393135	218.296	±	0.427525
215Q-2-Spot 315	1.6831	1.1524	380.502	0.0502266	1.80072	0.238438	1.88085	0.0344463	0.261709	0.368165	218.316	±	0.561787
215Q-2-Spot 182	1.21719	0.702703	330.362	0.0508188	2.0303	0.241527	2.14938	0.0344859	0.224546	0.566878	218.563	±	0.482548
215Q-2-Spot 104	1.15153	1.12653	215.727	0.0508239	2.60531	0.24163	2.72599	0.0344972	0.288429	0.461319	218.633	±	0.620028
215Q-2-Spot 231	3.76879	0.882588	228.108	0.051177	2.3577	0.243354	2.4743	0.0345035	0.271787	0.473044	218.673	±	0.584356
215Q-2-Spot 050	0.463906	1.21341	392.927	0.0504317	1.56638	0.240112	1.65444	0.0345303	0.260147	0.408122	218.84	±	0.569085
215Q-2-Spot 192	1.18489	1.04498	464.076	0.0504995	1.25928	0.240408	1.33412	0.0345432	0.197546	0.440303	218.92	±	0.425206
215Q-2-Spot 190	1.95605	1.03231	771.878	0.0503497	0.830264	0.239891	0.890128	0.0345715	0.192181	0.40594	219.096	±	0.413986
215Q-2-Spot 092	1.05876	1.11979	448.687	0.051123	1.36577	0.244064	1.45006	0.0346408	0.205232	0.467799	219.528	±	0.442956
215Q-2-Spot 055	0.645352	0.998463	1327.48	0.0504584	0.495781	0.243378	0.571159	0.0349819	0.238959	0.503817	221.653	±	0.529459
227Q-3-Spot 242	1.01123	1.03924	1335.2	0.049693	0.926	0.232492	1.0003	0.033932	0.284781	0.393566	215.11	±	0.612353
227Q-3-Spot 243	0.719589	1.40773	905.085	0.0500592	0.765799	0.237036	0.805162	0.0343421	0.175913	0.327535	217.667	±	0.382755
227Q-3-Spot 265	0.862474	0.955393	750.568	0.0508956	1.1825	0.241147	1.28127	0.0343634	0.304739	0.430555	217.8	±	0.663463
227Q-3-Spot 292	0.551512	1.06196	6423.02	0.0505416	0.189874	0.240663	0.403281	0.0345349	0.344037	0.882725	218.868	±	0.752699
227Q-3-Spot 286	21.9478	0.559749	157.378	0.0509185	3.46527	0.243533	3.61542	0.0346863	0.381359	0.438288	219.812	±	0.837952
243Q-2-Spot 132	4.38548	1.59302	254.911	0.0504929	2.11568	0.237361	2.22476	0.0341099	0.276396	0.446157	216.22	±	0.587712
243Q-2-Spot 215	1.29996	0.859991	602.281	0.0502523	1.36996	0.236544	1.44105	0.0341552	0.237689	0.372722	216.502	±	0.506055
243Q-2-Spot 243	1.51297	1.03094	416.349	0.0502502	1.79687	0.239001	1.9307	0.0345115	0.307798	0.498576	218.722	±	0.66193
243Q-2-Spot 098	0.886328	0.426822	938.294	0.0505104	0.668295	0.240251	0.737973	0.0345131	0.147136	0.547116	218.733	±	0.316435
243Q-2-Spot 052	2.42035	1.14348	416.882	0.0504998	1.32956	0.240254	1.40369	0.0345208	0.175059	0.472509	218.781	±	0.37657
243Q-2-Spot 235	1.75571	1.11034	452.112	0.0507148	1.34382	0.241791	1.41474	0.0345945	0.17549	0.453907	219.24	±	0.378275
243Q-2-Spot 116	1.74432	0.930058	526.254	0.0505036	1.15262	0.240847	1.24632	0.0346035	0.177445	0.577046	219.296	±	0.382586
243Q-2-Spot 103	1.56166	1.10426	472.001	0.0503276	1.23458	0.240278	1.31227	0.0346424	0.175184	0.494776	219.538	±	0.378121
243Q-2-Spot 307	1.42841	0.910372	1655.13	0.0504453	0.42079	0.241069	0.476335	0.0346754	0.173036	0.47766	219.744	±	0.373827
243Q-2-Spot 169	2.00373	1.4688	782.97	0.050535	0.693994	0.241608	0.758743	0.0346912	0.154122	0.499235	219.842	±	0.333112
243Q-2-Spot 185	2.03957	0.858014	1562.9	0.0506808	0.706469	0.24249	0.890143	0.0347178	0.297091	0.719426	220.008	±	0.642596
243Q-2-Spot 251	2.69391	0.888689	663.247	0.0507386	0.836897	0.24322	0.903137	0.0347825	0.195563	0.431653	220.411	±	0.423757
243Q-2-Spot 079	2.66575	0.798423	893.586	0.0505674	0.89903	0.242931	0.957979	0.0348589	0.230375	0.36594	220.887	±	0.500248
243Q-2-Spot 224	1.4755	0.778943	845.52	0.0503448	0.717701	0.241961	0.765787	0.0348732	0.161609	0.389627	220.976	±	0.351066
243Q-2-Spot 105	1.15724	1.02451	1024.47	0.0503857	0.730225	0.24233	0.786826	0.0348981	0.220446	0.384619	221.131	±	0.479208
243Q-2-Spot 036	5.97366	0.580613	240.147	0.0513746	2.17389	0.252109	2.27724	0.0356074	0.232055	0.485291	225.548	±	0.514344
287Y-2-Spot 049	1.66282	0.672508	507.542	0.0503254	1.21877	0.23864	1.28039	0.0344078	0.172172	0.414369	218.076	±	0.369186
287Y-2-Spot 056	1.65366	0.966542	143.232	0.051312	4.07257	0.246115	4.26224	0.0348032	0.444784	0.468781	220.54	±	0.964336
287Y-2-Spot 063	2.00319	0.581884	193.821	0.0516843	3.26186	0.248921	3.45783	0.0349466	0.406685	0.526719	221.433	±	0.885245
287Y-2-Spot 045	0.962634	1.18155	272.169	0.0505871	2.48191	0.252604	2.60842	0.0362328	0.309086	0.457927	229.44	±	0.696694
297Y-2-Spot 200	1.74705	0.933235	761.962	0.0503599	0.797609	0.241868	0.844786	0.0348494	0.150224	0.390148	220.828	±	0.326119
297Y-2-Spot 234	1.4024	0.48025	247.594	0.0479255	3.26612	0.230575	3.42479	0.0349098	0.326409	0.522232	221.204	±	0.709783
297Y-2-Spot 212	1.06569	0.897369	279.995	0.0510187	2.01591	0.245708	2.11439	0.0349455	0.234162	0.46509	221.426	±	0.509692
297Y-2-Spot 184	0.938674	1.63767	183.62	0.0503978	4.09099	0.243176	4.2603	0.0350114	0.377172	0.483818	221.837	±	0.822473
297Y-2-Spot 305	1.01918	0.597782	604.097	0.0509074	0.942199	0.245665	0.997619	0.0350157	0.168848	0.400911	221.863	±	0.368239
297Y-2-Spot 162	1.93235	0.895839	190.375	0.0521627	3.45729	0.251872	3.63706	0.0350364	0.360226	0.5358	221.993	±	0.786062
297Y-2-Spot 277	2.55937	1.01034	179.934	0.0515212	3.66919	0.248909	3.82214	0.0350555	0.394782	0.430908	222.111	±	0.861922
297Y-2-Spot 031	1.35561	1.1602	192.696	0.0503666	3.83951	0.24344	4.06633	0.0350712	0.406852	0.591558	222.209	±	0.888659
297Y-2-Spot 275	2.82989	1.11779	334.742	0.0506214	1.6288	0.244688	1.70887	0.0350735	0.195215	0.456048	222.224	±	0.426421
297Y-2-Spot 229	0.837812	0.625896	287.579	0.0515456	1.90889	0.249289	2.00308	0.0350923	0.249687	0.429763	222.341	±	0.545691
297Y-2-Spot 246	1.1901	0.873575	206.04	0.0514496	3.11355	0.248945	3.26073	0.0351093	0.331309	0.484527	222.446	±	0.724414
297Y-2-Spot 312	1.43271	0.927661	775.84	0.0504396	1.82527	0.244264	1.98359	0.0351389	0.315556	0.560438	222.631	±	0.690533
297Y-2-Spot 278	1.1659	1.04316	313.279	0.0508681	2.01984	0.246658	2.13312	0.0351844	0.226175	0.539447	222.914	±	0.495557
297Y-2-Spot 104	0.963744	1.52662	125.135	0.0511588	4.8014	0.248138	5.02741	0.0351945	0.492661	0.497091	222.977	±	1.07974
297Y-2-Spot 019	2.27557	1.08057	206.527	0.0520423	3.55148	0.252607	3.76796	0.03522	0.404647	0.572899	223.136	±	0.887465
297Y-2-Spot 264	0.959951	1.15028	368.096	0.0510044	1.76426	0.24772	1.89058	0.0352415	0.384828	0.418331	223.27	±	0.844497
297Y-2-Spot 078	1.14425	0.934461	1087.23	0.0509255	0.594286	0.24736	0.649678	0.0352448	0.131388	0.498759	223.29	±	0.288354
297Y-2-Spot 015	1.17215	0.750863	219.468	0.050536	2.65769	0.24571	2.78834	0.0352795	0.289115	0.49248	223.506	±	0.635116
297Y-2-Spot 039	1.02923	0.579437	1483.39	0.0506402	0.51279	0.249492	0.569368	0.0357488	0.137442	0.5057	226.428	±	0.305805
305Y-2-Spot 217	0.965706	0.705785	439.349	0.0503464	1.63683	0.242729	1.73671	0.0349828	0.198049	0.545527	221.659	±	0.431532
305Y-2-Spot 182	2.64635	0.890798	367.954	0.0503213	1.47988	0.243431	1.556	0.0351014	0.192362	0.446137	222.397	±	0.420513
305Y-2-Spot 119	2.00791	0.542538	172.322	0.0511324	3.61533	0.248389	3.77141	0.0352482	0.378035	0.454168	223.312	±	0.829742
305Y-2-Spot 197	2.02997	1.22957	173.595	0.0501449	4.74763	0.244146	4.87236	0.0353284	0.407616	0.3436	223.811	±	0.896635
305Y-2-Spot 243	3.41754	0.962922	132.696	0.0511058	4.53054	0.249807	4.7441	0.0354678	0.483516	0.482385	224.679	±	1.06765
319Y-2-Spot 059	1.36012	0.560415	495.538	0.0509159	1.25398	0.267726	1.31944	0.0381537	0.182683	0.41679	241.378	±	0.432804
319Y-2-Spot 153	1.81423	0.423138	1340.74	0.0511799	0.460311	0.270245	0.512446	0.0383141	0.129176	0.50222	242.374	±	0.307276
319Y-2-Spot 033	3.81003	0.639297	540.214	0.0512059	0.973246	0.270854	1.04564	0.0383809	0.17918	0.473129	242.789	±	0.426938
319Y-2-Spot 016	1.46303	0.552246	641.007	0.0511836	0.902324	0.272087	0.958505	0.0385724	0.16261	0.417187	243.978	±	0.389319
319Y-2-Spot 071	3.04085	0.657256	1172.1	0.0510645	0.452626	0.275806	0.504489	0.0391908	0.138425	0.485405	247.815	±	0.336529
319Y-2-Spot 073	1.40448	0.48353	973.095	0.0510476	0.742311	0.283241	0.805546	0.0402606	0.16683	0.464242	254.448	±	0.416226
319Y-2-Spot 159	2.14118	0.604386	365.694	0.0511023	1.71113	0.284968	1.80329	0.0404627	0.224816	0.460653	255.701	±	0.563605
319Y-2-Spot 106	1.01753	0.416864	585.398	0.0513622	0.999798	0.286443	1.07227	0.0404664	0.168278	0.492272	255.723	±	0.421902
319Y-2-Spot 137	4.07172	0.645572	139.891	0.0526771	3.86672	0.305917	4.04852	0.0421387	0.409186	0.484503	266.076	±	1.06658
319Y-2-Spot 129	2.12583	0.74016	240.991	0.0517165	2.36574	0.32064	2.50146	0.0449871	0.279494	0.527515	283.671	±	0.775654
319Y-2-Spot 264	1.09822	1.33214	337.756	0.051891	1.68321	0.324541	1.77788	0.0453812	0.200994	0.513486	286.102	±	0.562473
Pb blank composition is 206Pb/204Pb = 18.40 ± 0.64, 207Pb/204Pb = 15.64 ± 0.25, 208Pb/204Pb = 38.04 ± 0.75, and a 206Pb/204Pb–207Pb/204Pb correlation of +0.47.
Present day Th/U ratio is calculated from radiogenic 208Pb/206Pb and age.
Isotopic ratios corrected for mass fractionation (0.15 ± 0.06%/amu), tracer contribution and common Pb contribution (the latter for all ratios but 206Pb/204Pb).
ρ is correlation coefficient of radiogenic 207Pb/235U versus 206Pb/238U.
Uncertainties of individual ratios and ages are given at the 2σ level and do not include decay constant errors.
Deficient radiogenic 206Pb due to initial deficit of 230Th is accounted for by assuming a partition coefficient ratio DTh/DU of 0.2 (as applied in Wotzlaw et al., 2014).
Initial deficit of 230Th for zircons analyzed using ET535 is corrected assuming Th/U=3.5 in the magma.
